# Supplementary material for: Study of the particle characteristics and stability of Ag-NPs naturally generated in soil matrix
Source: Royal Society of Chemistry journal article supplement (doi:10.1039/d2nj04089a), 2022-01-01
Supplement: d2nj04089a1.pdf [file d2nj04089a1.pdf]

# Study on the Particle Characteristics and Stability of Ag-NPs Naturally Generated in Soil Matrix

Qiang Wang<sup>1,2\*</sup>, Ying-Rong Wang<sup>1</sup>, Wen-Jing Wei<sup>1</sup>, Hai-Lan Lin<sup>2</sup>, Ping-Jian Yang<sup>3\*</sup>

<sup>1</sup> Key Laboratory of Hunan Province for Water Environment and Agriculture Product Safety, College of  
Chemistry and Chemical Engineering, Central South University, Changsha 410083, Hunan, PR China

<sup>2</sup> State Environmental Protection Key Laboratory of Monitoring for Heavy Metal Pollutants

<sup>3</sup> Chinese Research Academy of Environmental Sciences, Dayangfang 8, Anwai, Chaoyang District, Beijing  
100012, PR China

\*Corresponding author: Dr. Qiang Wang: qwangcsu@163.com; Dr. Ping-Jian Yang:

yang.pingjian@craes.org.cn

Postal address: No. 932 Lushan Nan Road, Yuelu District, Changsha 410083, PR China

Phone number: +86 731 88876961

15 **This document contains: 8 pages, 1 text, 5 figures and 6 tables.**

16

## 17 **Text S1. Steps of the iterative algorithm for data processing**

18 The steps of iterative algorithm were outlined as follows: the standard deviation ( $\sigma$ ) and  
19 mean value ( $\mu$ ) of total raw dataset were calculated and the outliers which exceeding the value  
20 of ( $\mu + 5\sigma$ ) were removed. Subsequently,  $\mu$  and  $\sigma$  of the remaining fraction were recalculated  
21 and the procedure was repeated until no dataset could be removed, that was, convergence was  
22 achieved. Then iteration process end and the background signals were identified in this way.  
23 The particle events were identified and their intensities were recorded in succession. All target  
24 particles detected were assumed to be spherical and zero-valent for each event. The  
25 nanoparticle number concentration  $N_{NP}$ , particle mass  $m_{NP}$  and nanoparticle diameter  $d_{NP}$   
26 could be calculated as described in equation (1), (3) and (4), respectively.

$$27 \quad f_{NP} = N_{NP} Q_{sam} \eta_n \quad (1)$$

$$28 \quad W = \eta_n Q_{sam} t_{dwell} C \quad (2)$$

$$29 \quad m_{NP} = f_m^{-1} \left[ \frac{(I_{NP} - I_{bgd}) * \eta_i}{m} \right] \quad (3)$$

$$30 \quad d_{NP} = \sqrt[3]{\frac{6m_{NP}}{\pi\rho}} \quad (4)$$

31 Where,  $f_{NP}$  is frequency of pulse events (pulse per event),  $Q_{sam}$  is the sample flow rate  
32 ( $\text{mL} \cdot \text{min}^{-1}$ ),  $\eta_n$  is transport efficiency,  $W$  is the mass flux equation (mass per event),  $t_{dwell}$  is  
33 the dwell time (ms per event),  $C$  is analytical element of ionic calibration curve equation,  $I_{NP}$   
34 is nanoparticle signal intensity (cps),  $I_{bgd}$  is background signal intensity (cps),  $f_m$  is the mass  
35 fraction of analytical element,  $\eta_i$  is the particle ionization efficiency,  $m$  is the slope of the  
36 calibration curve for the dissolved ion ( $\text{cps} \cdot \mu\text{g}^{-1} \cdot \text{L}$ ),  $\epsilon_{neb}$  is the nebulization efficiency, and  $\rho$  is  
37 the particle density ( $\text{g} \cdot \text{cm}^{-3}$ ). Background signal includes instrument noise and signal from  
38 dissolved metal ions.

39

40

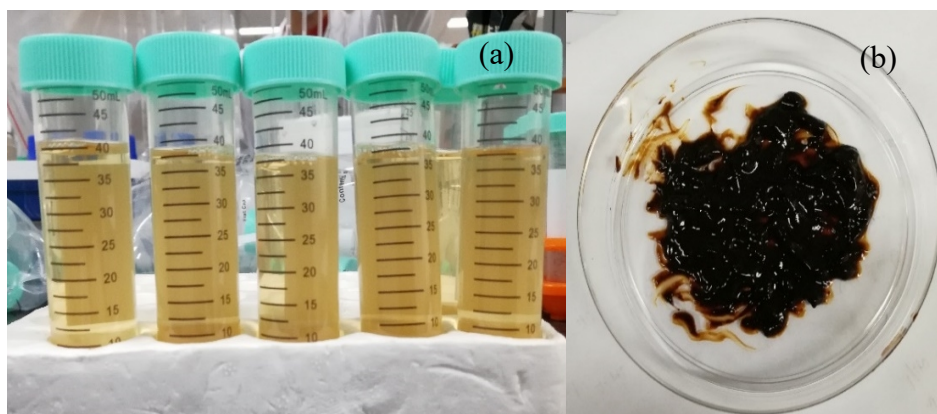

41

42

**Figure S1.** (a) Fulvic acid and (b) humus extracted from the environmental soil.

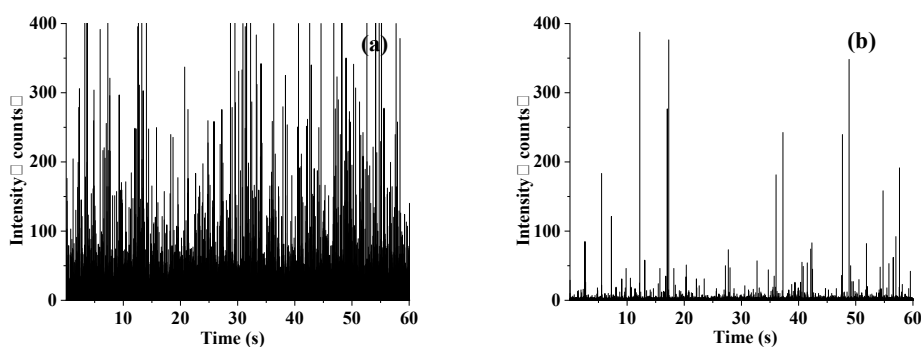

43

44

**Figure S2.** Time scans of Ag-NPs (a) with (b) without cloud point extraction.

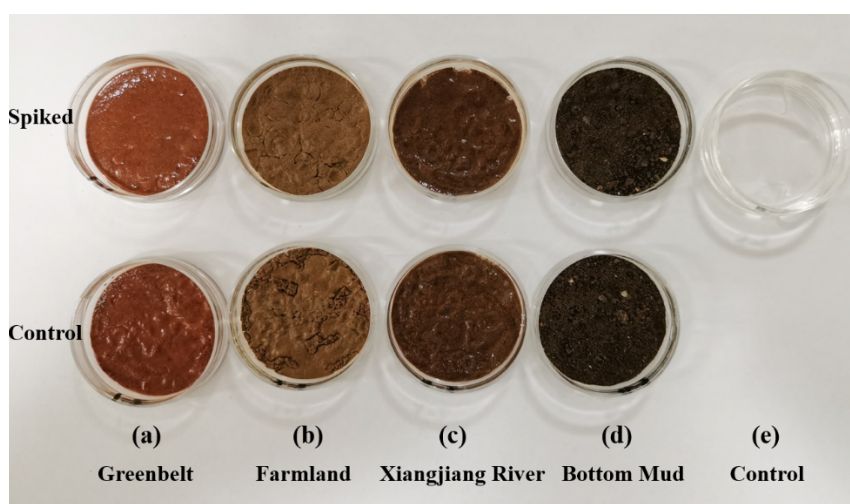

45

46

47

48

**Figure S3.** Visual observation of the generation of Ag-NPs in (a) Greenbelt, (b) Farmland, (c) Xiangjiang River, (d) Bottom Mud and (e) Control group.

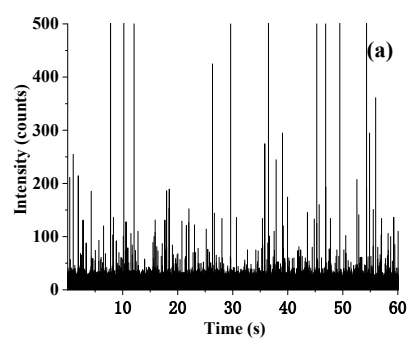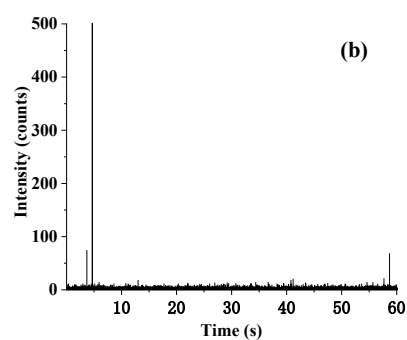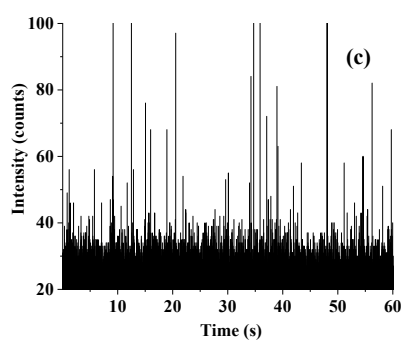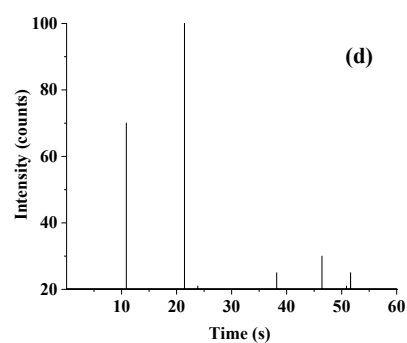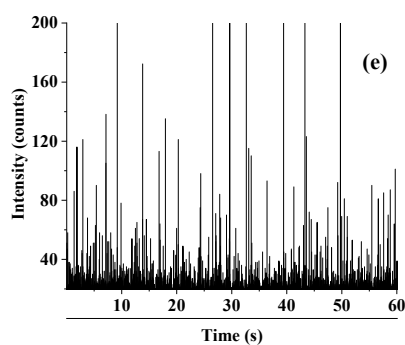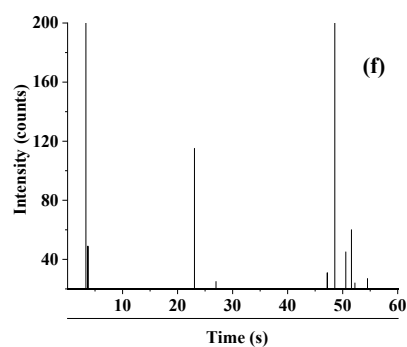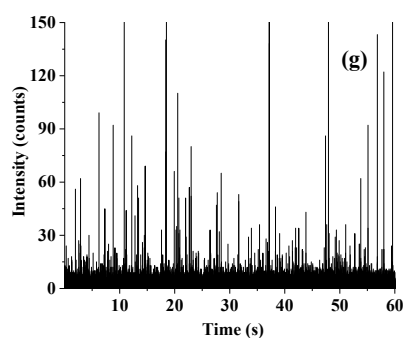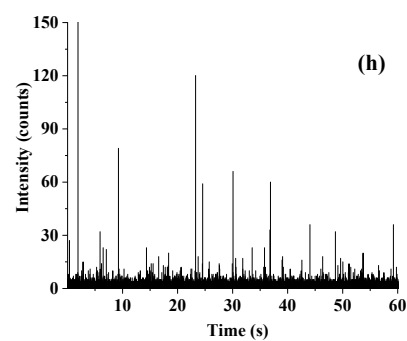

**Figure S4.** Time scans of Ag-NPs generated in Greenbelt (a) with (b) without, Farmland (c) with, (d) without, Xiangjiang River (e) with, (f) without, Bottom Mud (g) with and (h) without  $\text{Ag}^+$  added, respectively ( $1.6 \times 10^4$  times diluted).

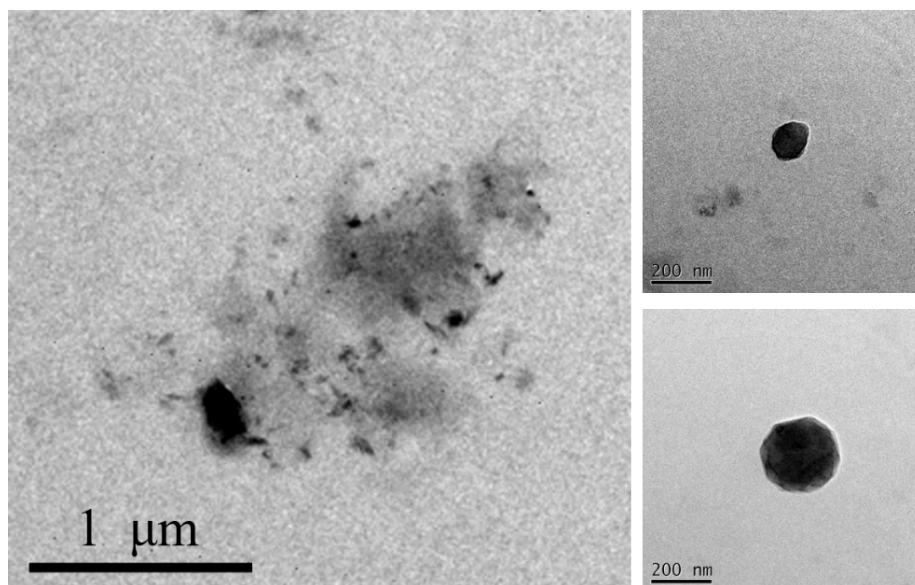

**Figure S5.** TEM images of the Ag-NPs generated in the soil.

61

**Table S1.** Basic physical and chemical properties of soil samples

| Sample           | pH<br>(KCl) | Conductivity<br>( $\mu\text{S cm}^{-1}$ ) | Ionic<br>strength (mM) | Organic matter<br>(%) | Ag<br>concentration ( $\text{mg kg}^{-1}$ ) |
|------------------|-------------|-------------------------------------------|------------------------|-----------------------|---------------------------------------------|
| Greenbelt        | 7.13        | 315.0                                     | 4.0950                 | 3.3791                | 0.0177                                      |
| Farmland         | 6.43        | 158.2                                     | 2.0566                 | 6.1909                | 0.0143                                      |
| Xiangjiang River | 7.41        | 107.3                                     | 1.3949                 | 3.1963                | 0.0530                                      |
| Bottom Mud       | 6.81        | 160.5                                     | 2.0865                 | 12.7893               | 0.0128                                      |

62

63

**Table S2.** Operational Parameters for SP-ICP-MS Analysis

| Instrumental parameters                          | Parameter values  |
|--------------------------------------------------|-------------------|
| RF power                                         | 1550              |
| Plasma gas flow rate ( $\text{L min}^{-1}$ )     | 15                |
| Sample flow rate ( $\text{mL min}^{-1}$ )        | 0.36              |
| Spray chamber temperature ( $^{\circ}\text{C}$ ) | 2                 |
| Data acquisition mode                            | TRA               |
| Dwell time (ms)                                  | 3                 |
| Acquisition time (s)                             | 60                |
| Mass monitored                                   | $^{107}\text{Ag}$ |

64

65

**Table S3.** Particle number concentration and size of Ag-NPs determined in the soil

| Sample           | Spiked sample                                |                                                   | Particle<br>size(nm) | Control sample                               |                                                   | Particle<br>size(nm) |
|------------------|----------------------------------------------|---------------------------------------------------|----------------------|----------------------------------------------|---------------------------------------------------|----------------------|
|                  | Particle number concentration                |                                                   |                      | Particle number concentration                |                                                   |                      |
|                  | 10 <sup>6</sup> particles<br>L <sup>-1</sup> | 10 <sup>6</sup> particles g <sup>-1</sup><br>soil |                      | 10 <sup>6</sup> particles<br>L <sup>-1</sup> | 10 <sup>6</sup> particles<br>g <sup>-1</sup> soil |                      |
|                  |                                              |                                                   |                      |                                              |                                                   |                      |
| Greenbelt        | 0.60                                         | 4.80                                              | 65                   | 0.19                                         | 1.52                                              | 37                   |
| Farmland         | 0.09                                         | 0.72                                              | 50                   | 0.22                                         | 1.76                                              | 30                   |
| Xiangjiang River | 0.46                                         | 3.68                                              | 51                   | 0.27                                         | 2.16                                              | 35                   |
| Bottom Mud       | 0.51                                         | 4.08                                              | 45                   | 0.35                                         | 2.80                                              | 32                   |

66

67

**Table S4.** Particle number concentration and average size of Ag-NPs

| Sample                     | Particle number concentration<br>(10 <sup>6</sup> particles L <sup>-1</sup> ) | Particle size (nm) |
|----------------------------|-------------------------------------------------------------------------------|--------------------|
| Control                    | 0.23 ±0.17                                                                    | 37.94±3.01         |
| Ag <sup>+</sup>            | 1.43 ±0.13                                                                    | 41.55±3.77         |
| Ag-NPs                     | 4.33 ±0.41                                                                    | 32.26±2.20         |
| Ag <sup>+</sup> and Ag-NPs | 4.90 ±0.14                                                                    | 33.97±3.47         |

68

69

**Table S5.** The influence of illumination on the generation of Ag-NPs

| Illumination intensity                       | Illumination | Particle number concentration        | Particle size |
|----------------------------------------------|--------------|--------------------------------------|---------------|
| ( $\mu\text{mol m}^{-2}\cdot\text{s}^{-1}$ ) | time (h)     | ( $10^6$ particles $\text{L}^{-1}$ ) | (nm)          |
| Illumination intensity                       |              |                                      |               |
| 0                                            | 10           | 0.38±0.09                            | 57.60±4.21    |
| 100                                          |              | 0.85±0.13                            | 63.63±4.63    |
| 200                                          |              | 2.20±1.13                            | 88.87±1.93    |
| 300                                          |              | 2.46±0.63                            | 78.93±4.40    |
| 400                                          |              | 3.10±1.08                            | 79.94±2.41    |
| 500                                          |              | 4.50±1.27                            | 79.63±1.70    |
| Illumination time                            |              |                                      |               |
| 300                                          | 0            | 0.24±0.03                            | 61.55±1.08    |
|                                              | 5            | 0.86±0.12                            | 72.29±0.35    |
|                                              | 10           | 5.50±1.27                            | 81.65±3.09    |
|                                              | 24           | 5.83±0.78                            | 80.95±3.14    |
|                                              | 48           | 6.63±0.55                            | 78.44±1.10    |
|                                              | 72           | 6.50±0.76                            | 82.14±1.36    |

70

**Table S6.** The influence of humic acid on the generation of Ag-NPs

| Fulvic Acid           | Humus                 | Particle number concentration                | Particle size |
|-----------------------|-----------------------|----------------------------------------------|---------------|
| (mg L <sup>-1</sup> ) | (mg g <sup>-1</sup> ) | (10 <sup>7</sup> particles L <sup>-1</sup> ) | (nm)          |
| Fulvic Acid           |                       |                                              |               |
| 0                     | /                     | 0.43±0.09                                    | 33.38±2.09    |
| 1                     |                       | 0.81±0.16                                    | 35.15±3.31    |
| 2                     |                       | 1.02±0.13                                    | 45.96±1.29    |
| 5                     |                       | 5.80±1.25                                    | 79.06±1.41    |
| 10                    |                       | 7.43±0.64                                    | 80.16±1.19    |
| 20                    |                       | 6.16±1.36                                    | 76.67±4.43    |
| Humus                 |                       |                                              |               |
| /                     | 0.00                  | 0.24±0.05                                    | 67.58±2.78    |
|                       | 0.01                  | 1.61±0.19                                    | 45.02±1.81    |
|                       | 0.02                  | 3.05±0.07                                    | 44.73±1.00    |
|                       | 0.05                  | 3.10±0.28                                    | 60.09±5.26    |
|                       | 0.10                  | 2.54±0.21                                    | 46.73±4.61    |
|                       | 0.15                  | 2.33±0.21                                    | 42.08±6.54    |
